# Supplementary material for: Ultrasmooth Organic Films Via Efficient Aggregation Suppression by a Low-Vacuum Physical Vapor Deposition
Source: MDPI journal article supplement (doi:10.3390/ma14237247), 2021-11-27
Supplement: s1 [file s1]

Supplementary material

## **Ultrasmooth organic films via efficient aggregation suppression by a low-vacuum physical vapor deposition**

Youngkwan Yoon, Jinho Lee, Seulgi Lee, Soyoung Kim, Hee Cheul Choi\*

Department of Chemistry, Pohang University of Science and Technology (POSTECH), Pohang  
37673, Republic of Korea

Corresponding authors. E-mail: [choihc@postech.edu](mailto:choihc@postech.edu)

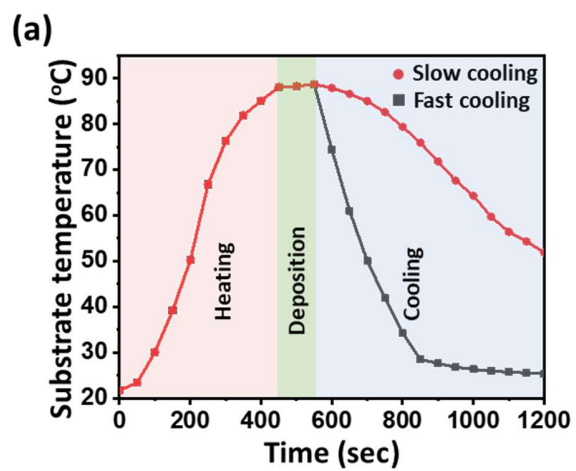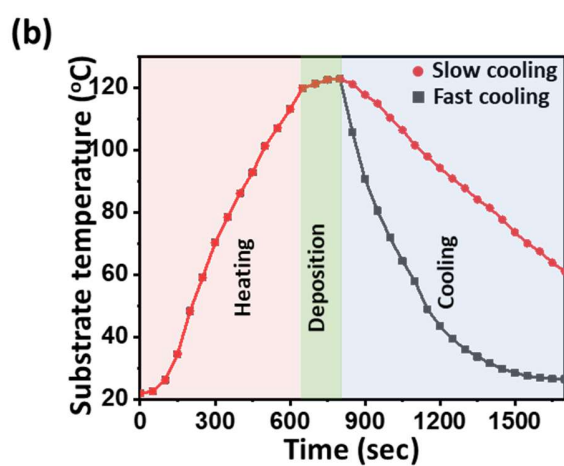

**Figure S1.** Substrate temperature profiles of (a) Alq<sub>3</sub>, NPD, and (b) PCBM depending on SCPVD method (red) and FCPVD method (grey).

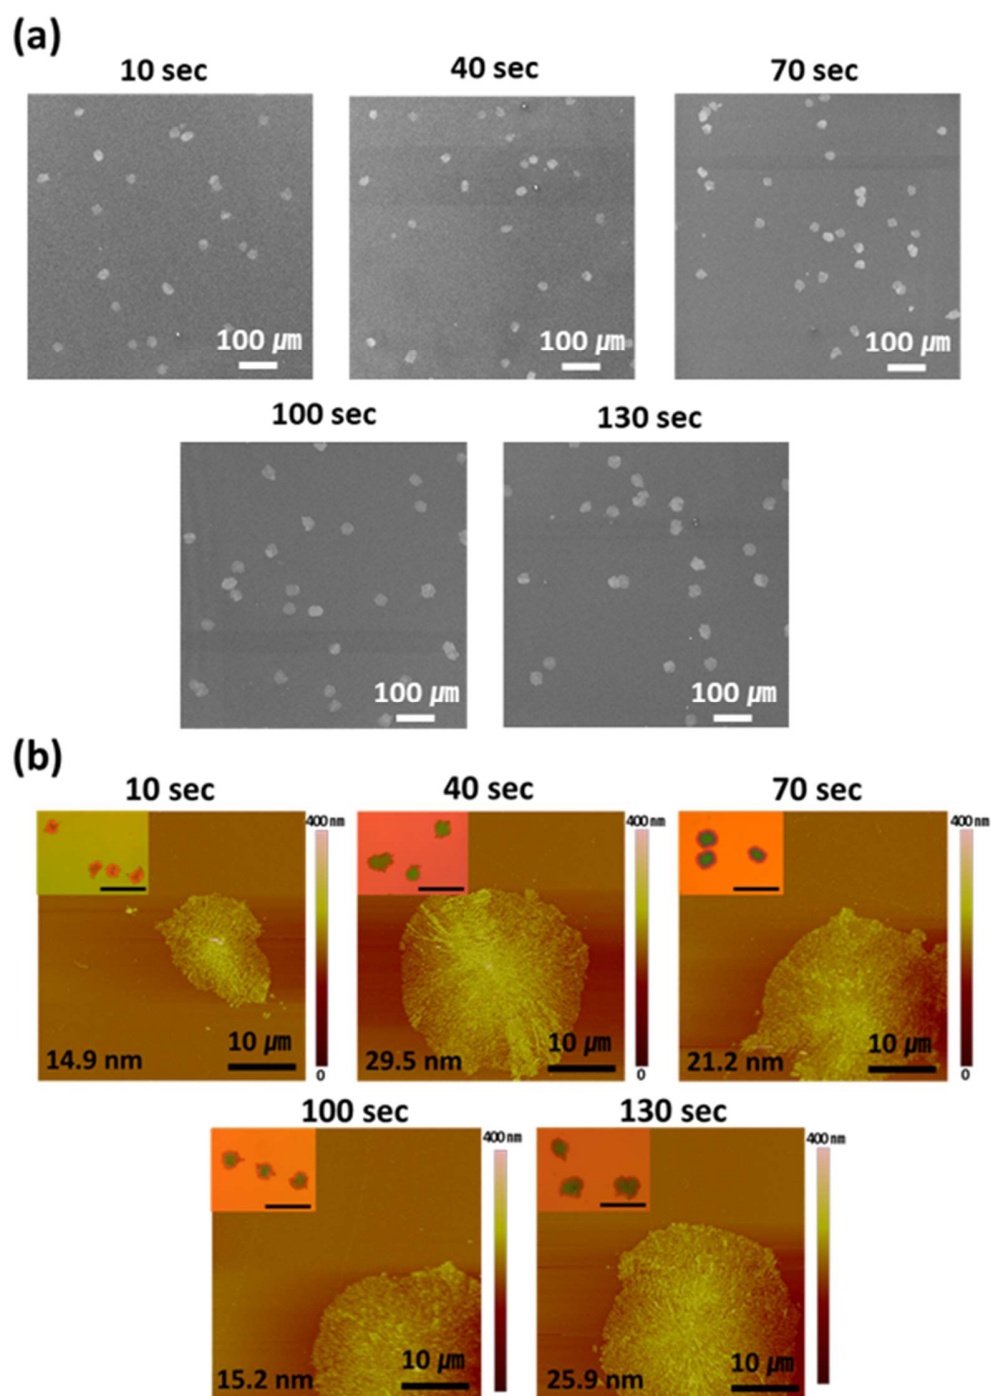

**Figure S2.** (a) SEM and (b) AFM images of rubrene films on Si/SiO<sub>2</sub> substrate obtained by SCPVD method depending on various deposition times.

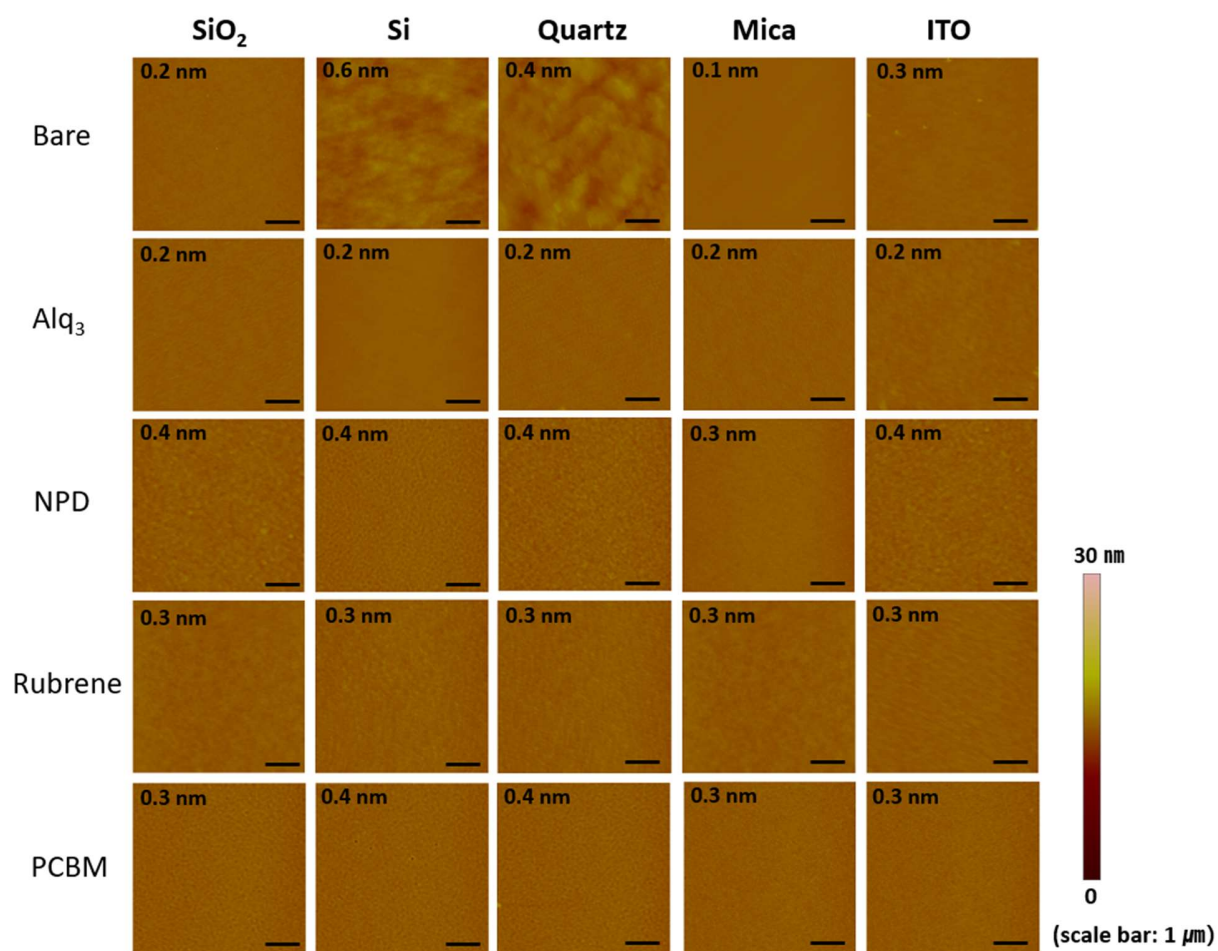

**Figure S3.** AFM images of rubrene, Alq<sub>3</sub>, NPD, and PCBM films on Si/SiO<sub>2</sub>, Si, quartz, mica, and ITO substrates obtained by FCPVD method.

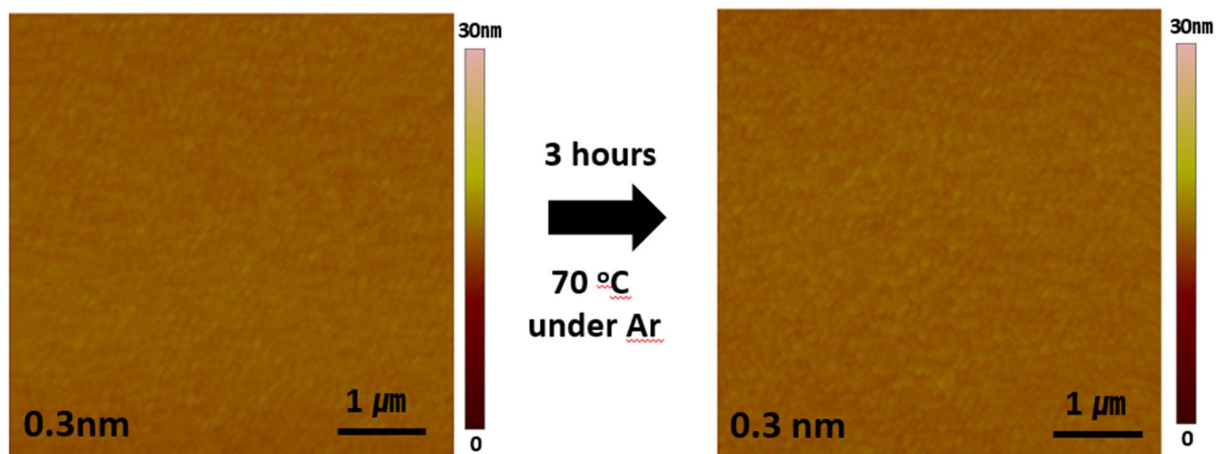

**Figure S4.** AFM images of rubrene film by FCPVD. The left image is as deposited rubrene film and the right image is the rubrene film annealed at 70 °C under Ar condition for 3 hours.

#### Rubrene - substrate temperature: 40 °C

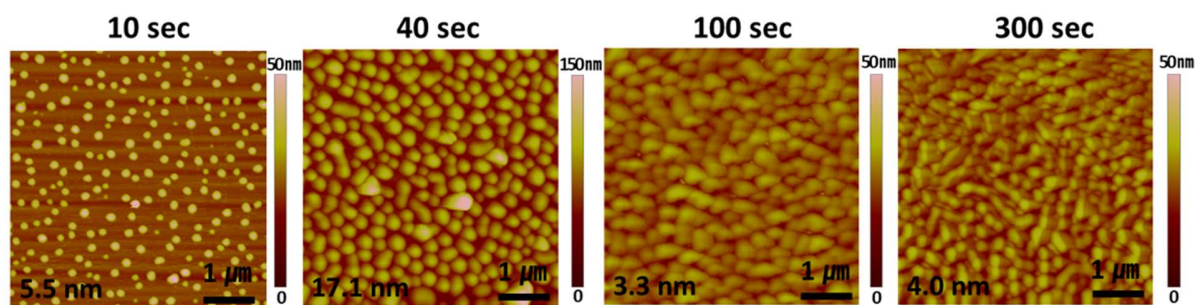

**Figure S5.** AFM images of rubrene films on the Si/SiO<sub>2</sub> substrate obtained at low substrate temperature (40 °C) condition depending on deposition time.

#### Rubrene - substrate temperature: 85 °C

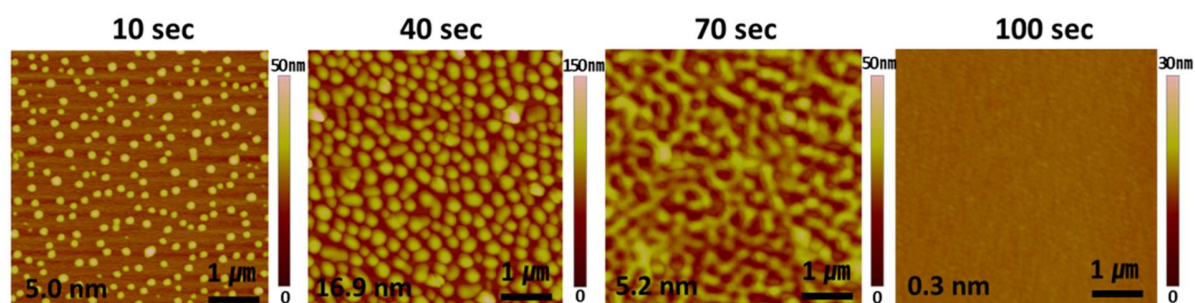

**Figure S6.** Surface morphologies of rubrene films on the Si/SiO<sub>2</sub> substrate obtained by FCPVD method depending on deposition time.



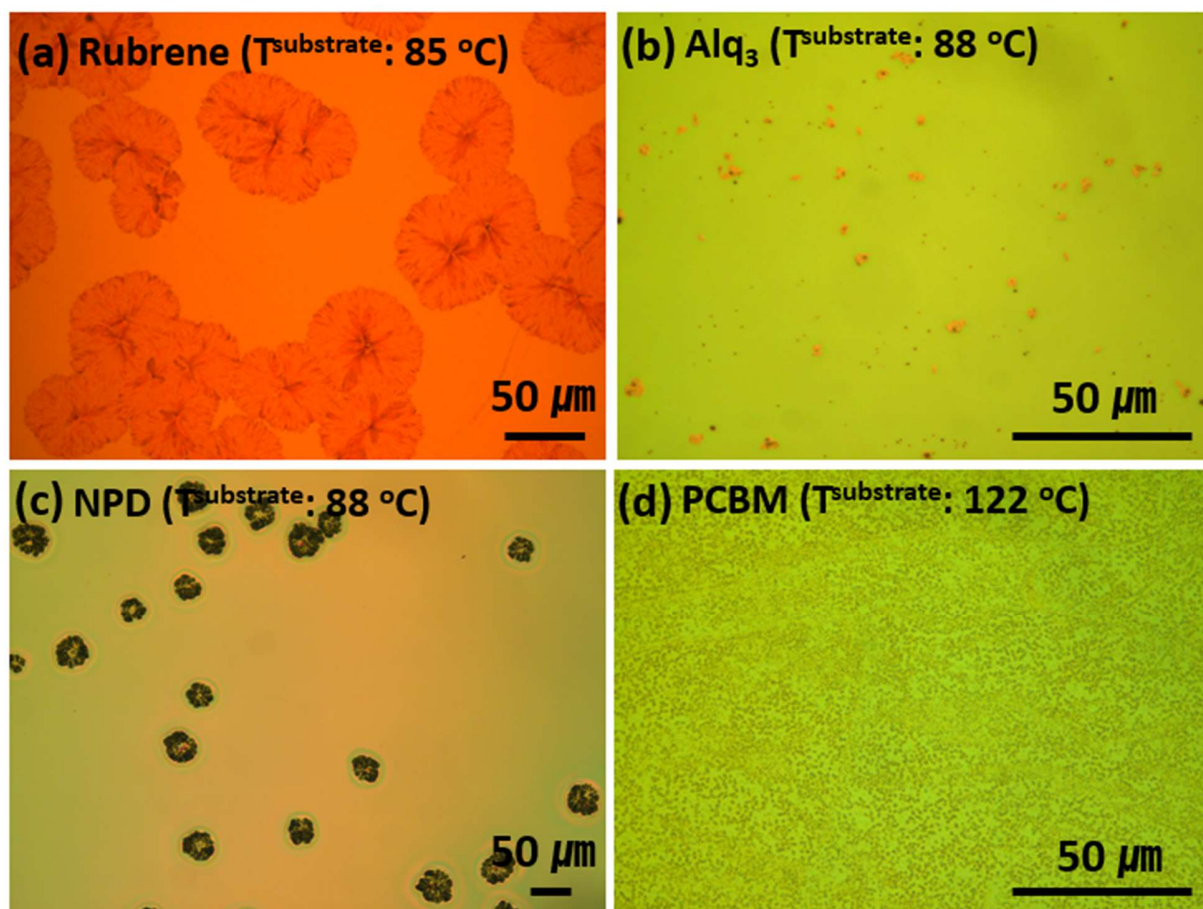

**Figure S7.** Optical microscope images of (a) rubrene, (b)  $\text{Alq}_3$ , (c) NPD, and (d) PCBM films on Si/SiO<sub>2</sub> substrates by the high-vacuum method.

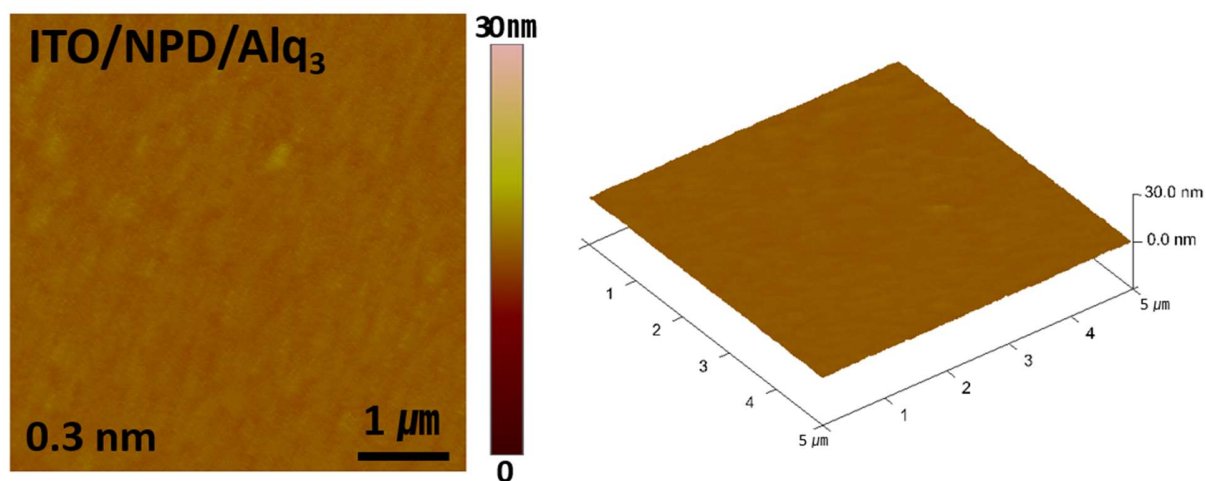

**Figure S8.** AFM images of heterojunction film in which NPD and  $\text{Alq}_3$  thin films were sequentially deposited on an ITO substrate by FCPVD

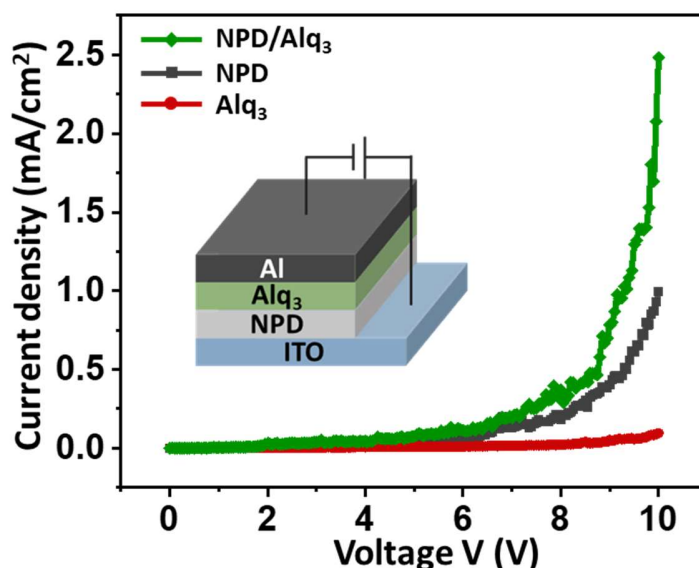

**Figure S9.** The current density-voltage characteristics of the devices prepared with ultrasmooth films obtained by FCPVD method. Heterojunction device (ITO/NPD/Alq<sub>3</sub>/Al), HOD (ITO/NPD/Al), and EOD (ITO/Alq<sub>3</sub>/Al) are represented as green, grey, and red lines respectively. The inset shows the device structure.

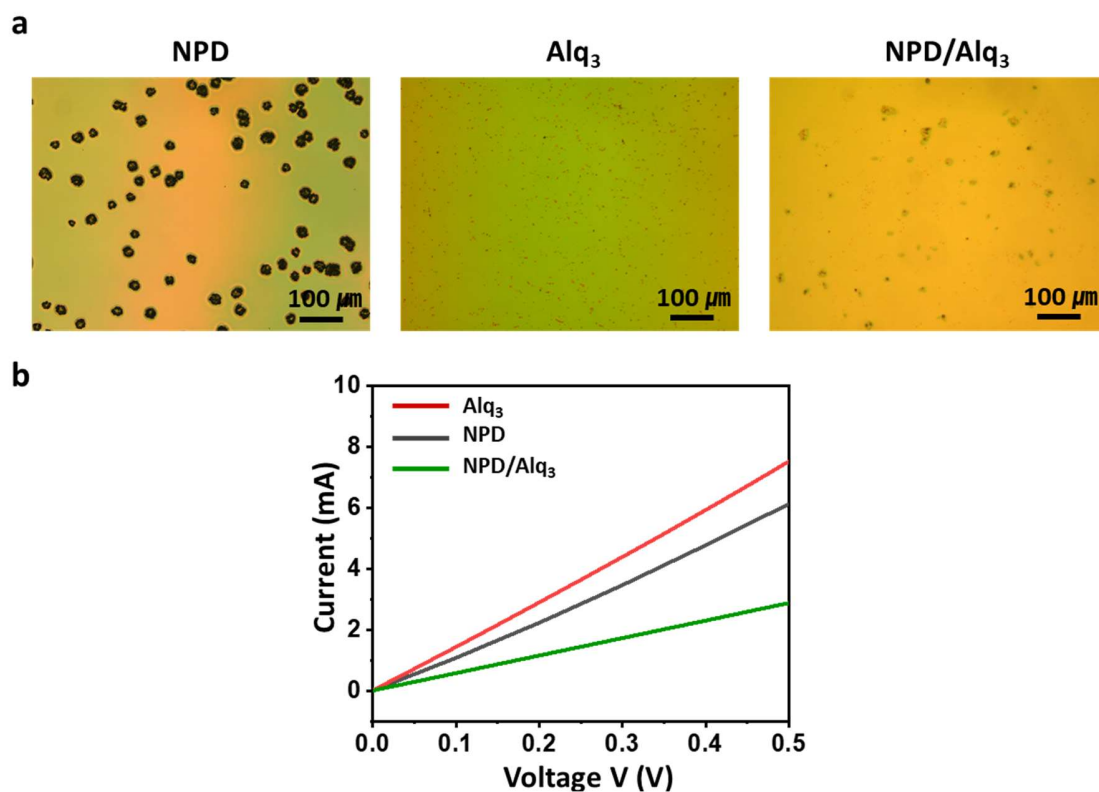

**Figure S10.** (a) Optical microscope images of NPD, Alq<sub>3</sub>, and NPD/Alq<sub>3</sub> films on ITO substrates. (b) Current-voltage characteristics of the devices prepared with rough films obtained by SCPVD method. EOD (ITO/Alq<sub>3</sub>/Al), HOD (ITO/NPD/Al), and heterojunction device (ITO/NPD/Alq<sub>3</sub>/Al) are represented as red, grey, and green lines respectively.

**Table S1.** The target temperature conditions and deposition time for ultrasmooth films.

|                  | $T^{\text{source}}$ | $T^{\text{substrate}}$ | Deposition time for<br>ultrasmooth films |
|------------------|---------------------|------------------------|------------------------------------------|
| Rubrene          | 250 °C              | 85 °C                  | 100 sec                                  |
| Alq <sub>3</sub> | 260 °C              | 88 °C                  | 110 sec                                  |
| NPD              | 260 °C              | 88 °C                  | 110 sec                                  |
| PCBM             | 310 °C              | 122 °C                 | 150 sec                                  |
